# Supplementary material
Source: Springer Nature journal article supplement (https://www.springermedizin.de/resource/supplementary/12986_2009_231_MOESM5_ESM.pdf/25655638)

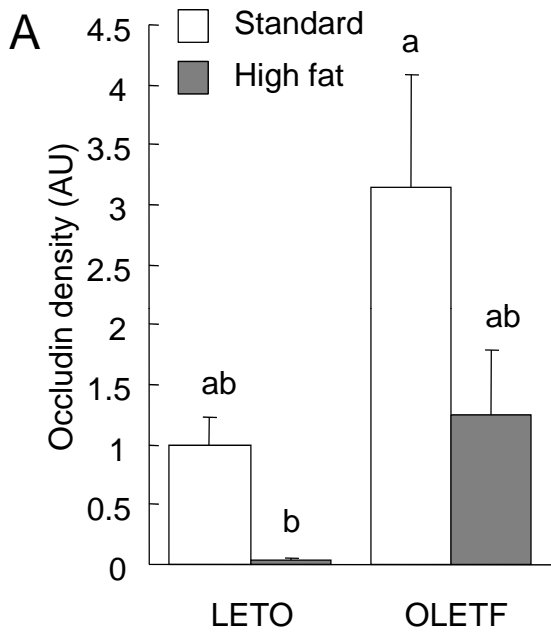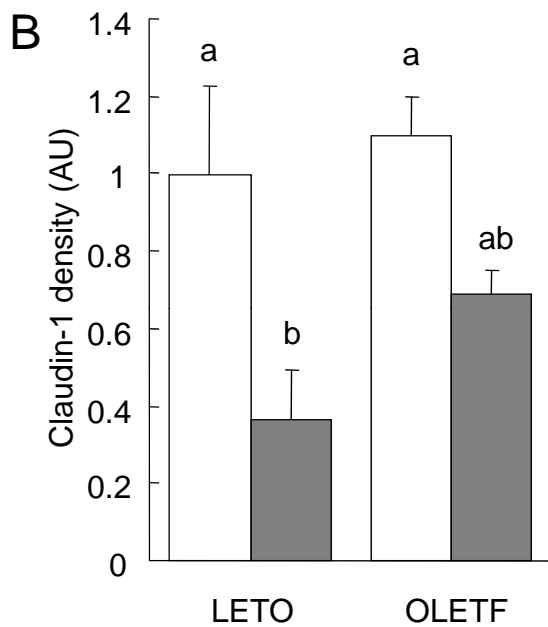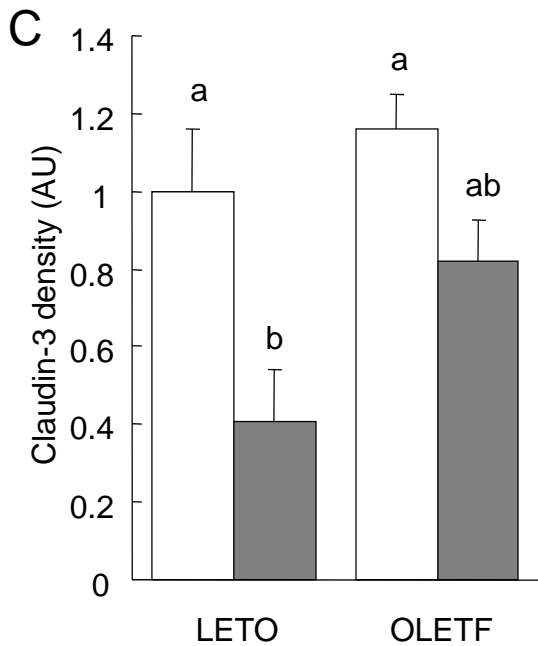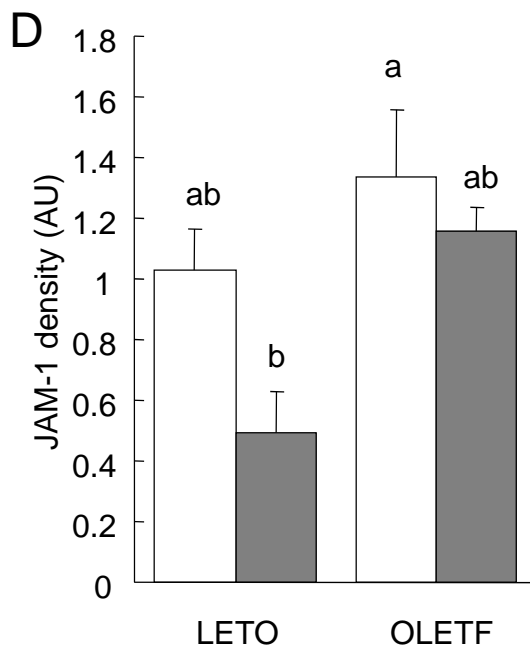

Supplement: MOESM5 [file 25655638]
